# Supplementary material
Source: PubMed Central journal article supplement (PMC4100249)
Supplement: NIHMS584189-supplement-01.pdf [file NIHMS584189-supplement-01.pdf]

**Online Table 1.** Detailed Annotation of Genes with Differentially Methylated CpG Loci in Low and High-risk Anal cancers

| Symbol    | Product                                              | Annotation                                                                                                                                     | Chromosome | Alternative Symbol | CpG Number*                                                        | Genomic Region                                                             | UCSC CpG Island Annotation           |
|-----------|------------------------------------------------------|------------------------------------------------------------------------------------------------------------------------------------------------|------------|--------------------|--------------------------------------------------------------------|----------------------------------------------------------------------------|--------------------------------------|
| ADAT3     | Adenosine deaminase, tRNA-specific 3                 | Genomic sequence overlap with SCAMP4; family of enzymes that forms inosine; edits transfer RNA                                                 | 19         |                    | cg20243900                                                         | 5'UTR                                                                      | Island                               |
| GSG1L     | Germ Cell Associated 1 (GSG1)-Like                   | Glutamate associated receptor subunit; Component of the inner core of AMPA-R complex; member of tetraspanin superfamily                        | 16         |                    | cg09528825                                                         | Body                                                                       | Island                               |
| KIAA0319  | KIAA0319                                             | Large, highly glycosylated, membrane protein with extracellular domain; function in adhesion and attachment                                    | 6          |                    | cg18428180                                                         | TSS1500;TSS200                                                             | Island                               |
| LOC728392 | LOC728392                                            | Uncharacterized; Derived by automated computational analysis using gene prediction method                                                      | 17         |                    | cg18671949<br>cg06462347<br>cg27230784<br>cg22298430<br>cg01433610 | TSS200<br>1stExon;5'UTR<br>1stExon;5'UTR<br>1stExon;5'UTR<br>1stExon;3'UTR | Island<br>Island<br>Island<br>Island |
| PARD3     | Partitioning defective 3 homolog                     | Member of the PARD protein; multimers that affect asymmetrical cell division and direct polarized cell growth                                  | 10         | PAR3               | cg26795540                                                         | Body                                                                       |                                      |
| SALL3     | SAL-Like 3                                           | Probable transcription factor; 4 double zinc finger (DZF) domain similar to SAL box motif                                                      | 18         |                    | cg13794993<br>cg14007067<br>cg06954658<br>cg16433156<br>cg05080154 | 1stExon<br>TSS200<br>TSS200<br>TSS200<br>TSS1500                           | Island<br>Island<br>Island<br>Island |
| SFRP2     | secreted frizzled-related protein 2                  | Tumor Suppressor Gene: cysteine-rich domain homologous to WNT-binding site of Frizzled proteins; SFRPs are soluble inhibitors of WNT signaling | 4          |                    | cg22178613                                                         | TSS1500                                                                    | Island                               |
| ST6GAL2   | ST6 beta-galactosamide alpha-2,6-sialyltransferase 2 | a type II transmembrane protein; involved in carbohydrate metabolism and cell growth                                                           | 2          |                    | cg13168617                                                         | 3'UTR                                                                      |                                      |
| SCAMP4    | Secretory Carrier Membrane Protein 4                 | Genomic sequence overlaps with ADAT3; Secretory carrier membrane protein                                                                       | 19         |                    | cg20243900                                                         | 5'UTR                                                                      | Island                               |

Type of file: table

Label: Online Table 2

Filename: Online Table 2.pdf

**Online Table 2.** Detailed Annotation of Genes with Differentially Methylated CpG Loci by Anal Tumor Size

| Symbol   | Product                                                          | Annotation                                                                                                                                                                                                                                                         | Chromosome | Alternative Symbol            | CpG Number* | Genomic Region | UCSC CpG Island Annotation |
|----------|------------------------------------------------------------------|--------------------------------------------------------------------------------------------------------------------------------------------------------------------------------------------------------------------------------------------------------------------|------------|-------------------------------|-------------|----------------|----------------------------|
| ADAT3    | Adenosine deaminase, tRNA-specific 3                             | Genomic sequence overlap with SCAMP4; family of enzymes that forms inosine; edits transfer RNA                                                                                                                                                                     | 19         |                               | cg01397065  | 5'UTR          | Island                     |
| AGFG2    | ArfGAP with FG repeats 2                                         | Member of the HIV-1 Rev binding protein (HRB) family; contains a zinc finger domain (Arf-GAP) and FG motifs (phe-gly), role in REV nucleocytoplasmic transfer                                                                                                      | 7          | HRBL; RABR                    | cg03431524  | Body           |                            |
| ALDH1L2  | ALDEHYDE DEHYDROGENASE 1 FAMILY, MEMBER L2                       | Member of both the aldehyde dehydrogenase superfamily and the formyl transferase superfamily; mitochondrial 10-formyltetrahydrofolate dehydrogenase; essential role in the distribution of one-carbon groups between the cytosolic and mitochondrial compartments. | 12         |                               | cg16527105  | Body           |                            |
| ASPSCR1  | alveolar soft part sarcoma (ASPS) chromosome region, candidate 1 | Contains a UBX domain and interacts with glucose transporter type 4 (GLUT4); involved in GLUT4 regulation as part of insulin signaling.                                                                                                                            | 17         |                               | cg11511084  | Body           | N_Shore                    |
| BDNFOS   | brain derived neurotrophic factor (BDNF) antisense RNA           | Noncoding natural antisense RNAs that regulated BDNF                                                                                                                                                                                                               | 11         | BDNF-AS                       | cg23330212  | Body           |                            |
| BLVRA    | biliverdin reductase A                                           | Serine/threonine/tyrosine kinase that catalyzes reduction of biliverdin to bilirubin; zinc metalloprotein with antioxidant properties.                                                                                                                             | 7          |                               | cg14579118  | TSS1500        | N_Shore                    |
| BRE      | brain and reproductive organ-expressed (TNFRSF1A modulator)      | Novel stress-responsive gene; death receptor-associated protein in cytoplasm; component of BRCA1/2-containing DNA repair complex in nucleus; anti-apoptotic activity by blocking TNF-a                                                                             | 2          | TNFRSF1A modulator and BRCC45 | cg13861527  | Body           |                            |
| C2orf74  | chromosome 2 open reading frame 74                               | Uncharacterized protein, predicted single pass membrane protein                                                                                                                                                                                                    | 2          |                               | cg01648237  | TSS200         |                            |
| C6orf136 | chromosome 6 open reading frame 136                              | Uncharacterized protein                                                                                                                                                                                                                                            | 6          |                               | cg13016528  | Body           | S_Shore                    |

| Symbol  | Product                                                | Annotation                                                                                                                                                                                                                       | Chromosome | Alternative Symbol                     | CpG Number* | Genomic Region | UCSC CpG Island Annotation |
|---------|--------------------------------------------------------|----------------------------------------------------------------------------------------------------------------------------------------------------------------------------------------------------------------------------------|------------|----------------------------------------|-------------|----------------|----------------------------|
| GET4    | golgi to ER traffic protein 4 homolog (S. cerevisiae)  | Member of a multiprotein complex involved in the post-translational delivery of tail-anchored membrane proteins from ribosomes to endoplasmic reticulum (ER) membrane; Involved in ubiquitination.                               | 7          | CEE; TRC35; CGI-20; C7orf20            | cg24580076  | TSS1500        | N_Shore                    |
| CCDC63  | coiled-coil domain containing 63                       | Uncharacterized; identified by genome-wide evaluation of expression transcripts                                                                                                                                                  | 12         | ODA5                                   | cg02855409  | TSS200         |                            |
|         |                                                        |                                                                                                                                                                                                                                  |            |                                        | cg10995082  | TSS200         |                            |
|         |                                                        |                                                                                                                                                                                                                                  |            |                                        | cg19006003  | 1stExon;5'UTR  |                            |
| CDK6    | cyclin-dependent kinase 6                              | Member of the cyclin-dependent protein kinase (CDK) family; regulates cell cycle and activity of pRb; regulated by miRNAa.                                                                                                       | 7          |                                        | cg23628117  | 3'UTR          |                            |
| COX8A   | cytochrome c oxidase subunit VIIIA (ubiquitous)        | Nuclear-encoded subunit of the cytochrome c oxidase complex; joined by >3 mitochondrial subunits; terminal enzyme of the respiratory chain; oxidative stress destabilizes the complex and can lead to disease, including cancer. | 11         | COX, COX8, COX8-2, COX8L, VIII, VIII-L | cg17292384  | 3'UTR          | S_Shore                    |
| CYP27C1 | cytochrome P450, family 27, subfamily C, polypeptide 1 | A member of the Cytochrome P450 family with ~15 families and several subfamilies. Cytochrome P450 proteins catalyze many reactions involved in drug metabolism and synthesis of cholesterol, steroids and other lipids.          | 2          |                                        | cg08022717  | Body           |                            |
| DMRT3   | Doublesex and MAB-3 related transcription factor 3     | Predicted to regulate transcription during sexual development.                                                                                                                                                                   | 9          | DMRTA3                                 | cg14176274  | Body           | Island                     |
| EBF3    | early B-cell factor 3                                  | Tumor suppressor gene; member of the early B-cell factor (EBF) family of DNA binding transcription factors                                                                                                                       | 10         | OE-2; EBF-3;                           | cg04804618  | Body           | Island                     |
|         |                                                        |                                                                                                                                                                                                                                  |            |                                        | cg14737286  | Body           | Island                     |
|         |                                                        |                                                                                                                                                                                                                                  |            |                                        | cg07076175  | TSS200         | Island                     |
| FAM150A | Family With Sequence Similarity 150, Member A          | Increased methylation by Infinium in more aggressive renal cell cancers                                                                                                                                                          | 8          |                                        | cg10094616  | TSS200         | Island                     |
|         |                                                        |                                                                                                                                                                                                                                  |            |                                        | cg22862746  | Body           | Island                     |
|         |                                                        |                                                                                                                                                                                                                                  |            |                                        | cg09442654  | 5'UTR;1stExon  | Island                     |

| Symbol  | Product                                        | Annotation                                                                                                                                                                                                                                        | Chromosome | Alternative Symbol  | CpG Number* | Genomic Region | UCSC CpG Island Annotation |
|---------|------------------------------------------------|---------------------------------------------------------------------------------------------------------------------------------------------------------------------------------------------------------------------------------------------------|------------|---------------------|-------------|----------------|----------------------------|
| FOS     | FBJ murine osteosarcoma viral oncogene homolog | Oncogene, Member of AP-1 transcription factor complex; regulates cell proliferation, differentiation, and transformation                                                                                                                          | 14         |                     | cg23404711  | Body           | S_Shore                    |
| FZD10   | Frizzled family receptor 10                    | Member of the frizzled gene family; 7-transmembrane domain proteins that are receptors for the WNT family of signaling proteins; coupled to the beta-catenin canonical signaling pathway                                                          | 12         |                     | cg13859208  | 3'UTR;1stExon  | S_Shore                    |
| GSG1L   | Germ Cell Associated 1 (GSG1)-Like             | Glutamate associated receptor subunit; Component of the inner core of AMPA-R complex; member of tetraspanin superfamily                                                                                                                           | 16         |                     | cg03921753  | 1stExon        | Island                     |
|         |                                                |                                                                                                                                                                                                                                                   |            |                     | cg09528825  | Body           | Island                     |
|         |                                                |                                                                                                                                                                                                                                                   |            |                     | cg03394150  | Body           | Island                     |
| GULP1   | engulfment adaptor PTB domain containing 1     | Adapter protein for engulfment of apoptotic cells by phagocytes                                                                                                                                                                                   | 2          | CED6; GULP          | cg19202813  | 5'UTR          |                            |
| HDAC2   | histone deacetylase 2                          | Forms transcriptional repressor complexes responsible for the deacetylation of lysine residues at the N-terminal regions of core histones (H2A, H2B, H3 and H4). Epigenetic regulation of transcription, cell cycle progression, and development. | 6          |                     | cg15069235  | Body           | N_Shore                    |
| HORMAD2 | HORMA domain containing 2                      | Proposed involvement in meiotic progression; protein that localizes to unsynapsed meiotic chromosomes.                                                                                                                                            | 22         |                     | cg24211826  | 3'UTR          |                            |
| HOXA6   | homeobox A6                                    | Encodes a DNA-binding transcription factor from HOXA cluster on chromosome 7: regulates gene expression, morphogenesis, and differentiation.                                                                                                      | 7          | HOX1; HOX1B; HOX1.2 | cg23129930  | 1stExon        | Island                     |
| HS6ST1  | heparan sulfate 6-O-sulfotransferase 1         | Member of the heparan sulfate biosynthetic enzyme family; type II membrane protein for 6-O-sulfation of heparin sulfate                                                                                                                           | 2          | HH15, HS6ST         | cg08472795  | Body           |                            |

| Symbol          | Product                                                                                                     | Annotation                                                                                                                                                                                                                                                  | Chromosome | Alternative Symbol                    | CpG Number*              | Genomic Region     | UCSC CpG Island Annotation |
|-----------------|-------------------------------------------------------------------------------------------------------------|-------------------------------------------------------------------------------------------------------------------------------------------------------------------------------------------------------------------------------------------------------------|------------|---------------------------------------|--------------------------|--------------------|----------------------------|
| KIR3DX1         | killer cell immunoglobulin-like receptor, three domains, X1                                                 | Member of the KIR family (17 members total) of receptors on natural killer cells; involved in innate response to infection and cancer; ancestral KIR3DX1 gene was identified by homology to rhesus monkey; expression in humans unknown; may be pseudogene. | 19         | LENG12;<br>KIR3DL0                    | cg10731960               | TSS1500            |                            |
| KLHL29          | kelch-like family member 29                                                                                 | Complete sequence is not known with certainty; Predicted domains (Kelch repeats; BTB/POZ) infer homo- or heterodimer interactions. Kelch repeats associated with actin tails.                                                                               | 2          | KBTBD9;<br>KIAA1921                   | cg00537210               | Body               | S_Shore                    |
| MECOM           | MDS1 and EVI1 complex locus                                                                                 | Transcriptional regulator and oncoprotein                                                                                                                                                                                                                   | 3          | EVI1,<br>MDS1,<br>MDS1-EVI1,<br>PRDM3 | cg20528780               | Body               |                            |
| MF12            | antigen p97 (melanoma associated) identified by monoclonal antibodies 133.2 and 96.5; aka Melanotransferrin | Cell-surface glycoprotein; similarities to members of the transferrin superfamily; involved in iron transport from cell surface                                                                                                                             | 3          | MTF1;<br>CD228;<br>MAP97              | cg00477017               | Body               | S_Shore                    |
| MIR200B;MIR200A | microRNA 200b / MicroRNA 200a                                                                               | Members of the MIR200 family; cluster of MIR200B/200A/429 jointly regulated; predicted microRNA stem-loop; master mediators of the epithelial phenotype                                                                                                     | 1          |                                       | cg14161399               | TSS200;TS<br>S1500 | S_Shore                    |
|                 |                                                                                                             |                                                                                                                                                                                                                                                             |            |                                       | cg02825344               | TSS200;TS<br>S1500 | S_Shore                    |
| MMP9            | matrix metalloproteinase 9 (gelatinase B, 92kDa gelatinase, 92kDa type IV collagenase)                      | Member of the matrix metalloproteinase (MMP) family; degrades type IV and V collagens in extracellular matrix; involved in tissue remodeling and development                                                                                                | 20         | GELB;<br>CLG4B;<br>MMP-9;<br>MANDP2   | cg17664577               | Body               | Island                     |
| MRPS22          | Mitochondrial ribosomal protein S22                                                                         | 28S subunit protein of mitochondrial ribosomal (mitoribosome); no related prokaryotic proteins; Located in telemetric region                                                                                                                                | 3          |                                       | cg11277156               | Body               | S_Shelf                    |
| MSI2            | musashi RNA-binding protein 2                                                                               | RNA binding protein and progenitor stem-cell marker                                                                                                                                                                                                         | 17         | MSI2H                                 | cg04486382<br>cg19810715 | Body<br>Body       |                            |

| Symbol  | Product                                                                       | Annotation                                                                                                                                                                                                                                         | Chromosome | Alternative Symbol                | CpG Number*                            | Genomic Region                | UCSC CpG Island Annotation |
|---------|-------------------------------------------------------------------------------|----------------------------------------------------------------------------------------------------------------------------------------------------------------------------------------------------------------------------------------------------|------------|-----------------------------------|----------------------------------------|-------------------------------|----------------------------|
| NPTX1   | neuronal pentraxin I                                                          | Encodes a binding protein for the snake venom toxin, taipoxin.                                                                                                                                                                                     | 17         | NP1                               | cg20853771                             | 3'UTR                         | N_Shore                    |
| OR2C3   | olfactory receptor, family 2, subfamily C, member 3                           | Receptor in G-protein mediated transduction of odorant signals.                                                                                                                                                                                    | 1          | OR2C4;<br>OST742                  | cg20320823                             | TSS1500                       | S_Shelf                    |
| PAK1    | p21 protein (Cdc42/Rac)-activated kinase 1                                    | Target for small GTP binding proteins (Cdc42/Rac); regulated cell motility and morphology; oncogenic                                                                                                                                               | 11         | PAKalpha                          | cg24536703                             | 5'UTR                         | N_Shore                    |
| PDE3B   | phosphodiesterase 3B, cGMP-inhibited                                          | Genomic sequence overlaps with PSMA1. Member of the cyclic nucleotide phosphodiesterase family; dual-specificity for cAMP/cGMP; involved in adipose tissue metabolism and angiogenesis.                                                            | 11         | HcGIP1;<br>cGIPDE1                | cg21901307                             | TSS1500;5'UTR;1stExon         | N_Shore                    |
| PSMA1   | proteasome (prosome, macropain) subunit, alpha type, 1                        | Genomic sequence overlaps with PDE3B. member of the peptidase T1A family, a 20S core alpha subunit of the multicatalytic proteinase complex; Proteasome cleaves peptides in an ATP/ubiquitin-dependent process and processes class I MHC peptides. | 11         | NU; HC2;<br>PROS30                | cg21901307                             | TSS1500;5'UTR;1stExon         | N_Shore                    |
| PLA2G2A | phospholipase A2, group IIA (platelets, synovial fluid)                       | Involved in regulation of the phospholipid metabolism in biomembranes.                                                                                                                                                                             | 1          | MOM1;<br>PLA2;<br>PLA2B;<br>PLA2L | cg13211559                             | TSS1500;TSS1500;TSS1500       |                            |
| PLEKHG1 | pleckstrin homology domain containing, family G (with RhoGef domain) member 1 | Member of the Dbl family of Rho guanine nucleotide exchange factors (RhoGEFs) (70 members). RhoGEFs activate Rho GTPases. Targets for PLEKHG1 uncharacterized.                                                                                     | 6          | ARHGEF41                          | cg26852242                             | 5'UTR                         |                            |
| PLEKHG3 | pleckstrin homology domain containing, family G (with RhoGef domain) member 3 | Member of the Dbl family of Rho guanine nucleotide exchange factors (RhoGEFs) (70 members). RhoGEFs activate Rho GTPases. Targets for PLEKHG3 uncharacterized.                                                                                     | 14         | ARHGEF43;<br>KIAA0599             | cg11802553                             | Body                          |                            |
| PON3    | paraoxonase 3                                                                 | Rapidly hydrolyzes lactones; inhibits oxidation of low-density lipoprotein (LDL).                                                                                                                                                                  | 7          |                                   | cg04080282<br>cg08898155<br>cg11435506 | TSS1500<br>TSS1500<br>TSS1500 | Island<br>Island<br>Island |
| PPP1R9A | protein phosphatase 1, regulatory subunit 9                                   | Regulatory subunit of protein phosphatase I; controls actin cytoskeleton reorganization.                                                                                                                                                           | 7          | NRB1;<br>NRBI;<br>Neurabin-I      | cg09724492                             | TSS1500;5'UTR                 | S_Shore                    |

| Symbol  | Product                                                                        | Annotation                                                                                                                                                                                                                        | Chromosome | Alternative Symbol                            | CpG Number* | Genomic Region | UCSC CpG Island Annotation |
|---------|--------------------------------------------------------------------------------|-----------------------------------------------------------------------------------------------------------------------------------------------------------------------------------------------------------------------------------|------------|-----------------------------------------------|-------------|----------------|----------------------------|
| RERE    | arginine-glutamic acid dipeptide (RE) repeats                                  | Encoded protein co-localizes with a transcription factor in the nucleus; pro-apoptotic; caspase-dependent                                                                                                                         | 1          | ARG; ARP; DNB1; ATN1L                         | cg19679865  | 5'UTR;Body     |                            |
| RNASEN  | ribonuclease type III, nuclear                                                 | miRNA processing enzyme                                                                                                                                                                                                           | 5          | DROSHA                                        | cg04590036  | Body           |                            |
| RREB1   | ras responsive element binding protein 1                                       | Zinc finger transcription factor that binds to RAS-responsive elements (RREs) of gene promoters.                                                                                                                                  | 6          | HNT; FINB; LZ321; Zep-1                       | cg03137792  | Body           |                            |
| SCAMP4  | Secretory Carrier Membrane Protein 4                                           | Genomic sequence overlaps with ADAT3; Secretory carrier membrane protein; Not involved in endocytosis                                                                                                                             | 19         |                                               | cg01397065  | 5'UTR          | Island                     |
| SEPP1   | selenoprotein P, plasma, 1                                                     | Extracellular glycoprotein; binds heparin; antioxidant activities in extracellular space                                                                                                                                          | 5          | SeP; SELP                                     | cg08626131  | TSS1500        |                            |
| SLC9A3  | SLC9A3 solute carrier family 9, subfamily A, member 3                          | Sodium/hydrogen exchanger 3; Involved in pH regulation and sodium balance; essential to maintain the epithelial barrier function.                                                                                                 | 5          | NHE3                                          | cg06058576  | Body           | Island                     |
| SNTB1   | syntrophin, beta 1 (dystrophin-associated protein A1, 59kDa, basic component 1 | AKA dystrophin-associated protein A1, 59kDa, basic component 1. membrane protein associated with dystrophin and dystrophin-related proteins. May link receptors to the actin cytoskeleton and the dystrophin glycoprotein complex | 8          | A1B; SNT2; BSYN2; 59-DAP; DAPA1B              | cg04318006  | 1stExon        | Island                     |
| STMN2   | stathmin-like 2                                                                | Stathmin proteins function in microtubule dynamics and signal transduction; STMN2 reported in neuronal growth and osteogenesis.                                                                                                   | 8          | SCG10; SCGN10                                 | cg00398130  | Body           | Island                     |
| SURF6   | Surfeit 6                                                                      | Located in the surfeit gene cluster in telomere region (60Kb region spanning 6 Surfeit genes, all with 5' CpG island); supports nucleolar matrix structure and function(s) via its association with nucleic acids.                | 9          | RRF14                                         | cg01832218  | Body           | N_Shore                    |
| TMEM196 | transmembrane protein 196                                                      | No publications; function unknown                                                                                                                                                                                                 | 7          |                                               | cg18505401  | TSS200         | Island                     |
| TRA2B   | transformer 2 beta homolog                                                     | Nuclear sequence-specific splicing factor; role in mRNA processing, splicing patterns, and gene expression.                                                                                                                       | 3          | SFRS10; SRFS10; TRAN2B; TRA2-BETA; Htra2-beta | cg12825509  | Body           |                            |



| Symbol | Product                                               | Annotation                                                                                                                                                                                                                                             | Chromosome | Alternative Symbol | CpG Number* | Genomic Region | UCSC CpG Island Annotation |
|--------|-------------------------------------------------------|--------------------------------------------------------------------------------------------------------------------------------------------------------------------------------------------------------------------------------------------------------|------------|--------------------|-------------|----------------|----------------------------|
| TTC9   | Tetratricopeptide Repeat Domain-Containing 9          | Associated with the endoplasmic reticulum; contains 3 tetratricopeptide repeats (degenerate 34 amino acid sequence motif)                                                                                                                              | 14         | KIAA0227           | cg01634544  | Body           |                            |
| VWDE   | von Willebrand factor D and EGF domains               | Contains 7 epidermal growth factor (EGF) like domains and 1 vWF D' domain; both domains found in secreted proteins and promote protein-protein interactions; Identified in genome-wide sequencing.                                                     | 7          |                    | cg02935154  | 5'UTR;1stExon  | Island                     |
|        |                                                       |                                                                                                                                                                                                                                                        |            |                    | cg16278512  | 5'UTR;1stExon  | Island                     |
| WNT9A  | wingless-type MMTV integration site family, member 9A | Member of the WNT gene family of 19 cysteine-rich secreted glycoproteins; extracellular signaling molecules when bound to Frizzles receptors; clustered by WNT3A. WNT9a involved in canonical signaling pathway leading to stabilization of b-catenin. | 1          |                    | cg26452081  | Body           | N_Shore                    |
| ZHX2   | ZHX2 zinc fingers and homeoboxes 2                    | Member of the zinc fingers and homeoboxes gene family; nuclear homo- and heterodimeric transcriptional repressor                                                                                                                                       | 8          | RAF; AFR1          | cg01801603  | 5'UTR          | S_Shore                    |
